# Supplementary material for: IL-27 targets Foxp3+ Tregs to mediate antiinflammatory functions during experimental allergic airway inflammation
Source: JCI journal article supplement (doi:10.1172/jci.insight.123216), 2019-01-23
Supplement: sd1 [file 1]

Supplementary Figure S1

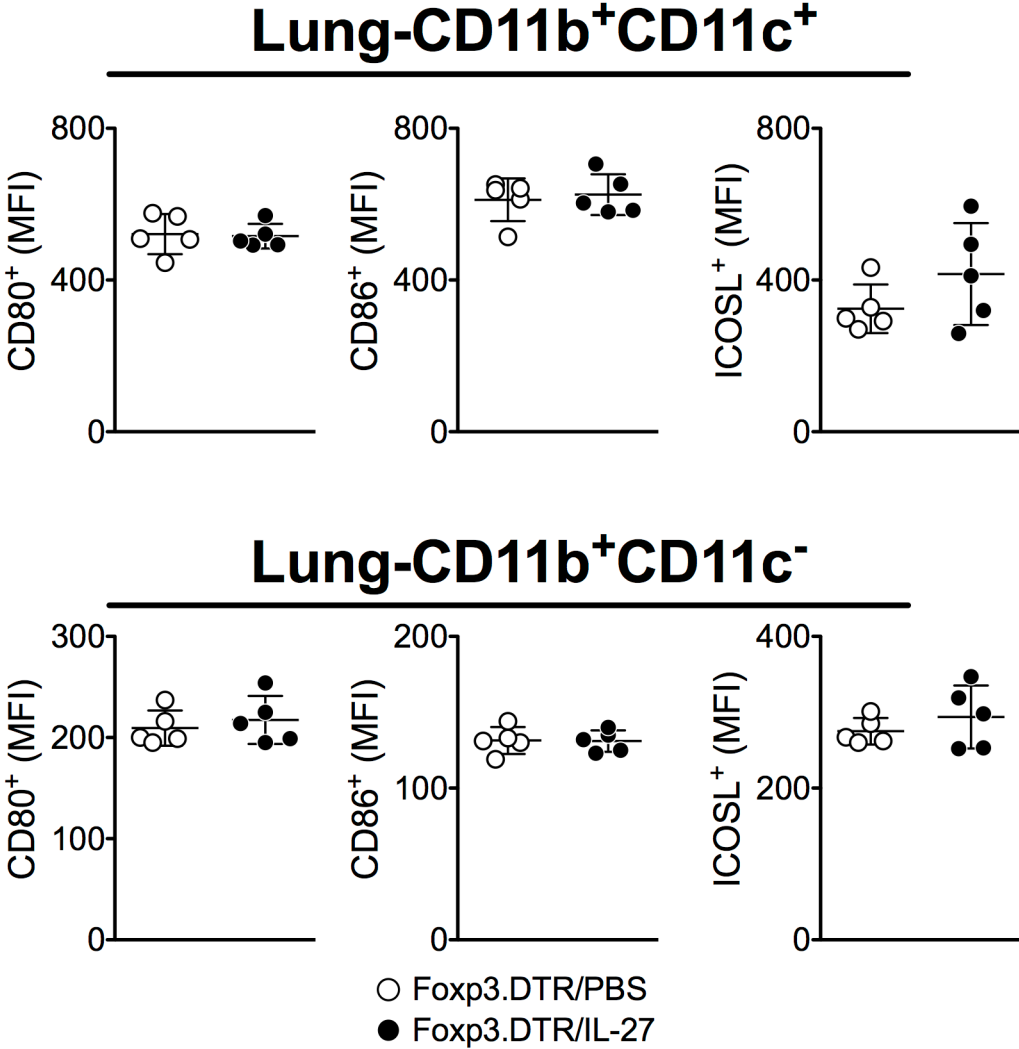

**Supplementary Figure S1. IL-27 does not APC expression of costimulatory molecules.**

Groups of Fxp3.DTR mice were induced for airway inflammation with or without intranasal IL-27 administration. Surface expression of CD80, CD86, and ICOS ligand on CD11b<sup>+</sup>CD11c<sup>+</sup> and CD11b<sup>+</sup>CD11c<sup>-</sup> cells in the lung was compared by flow analysis.
